# Supplementary material for: The correlation between heart rate variability index and vulnerability prognosis in patients with acute decompensated heart failure
Source: PeerJ. 2023 Nov 13;11:e16377. doi: 10.7717/peerj.16377 (PMC10652843; doi:10.7717/peerj.16377)
Supplement: Supplemental Information 1 [file peerj-11-16377-s001.xlsx]

## Sheet: the poor prognosis group
Num	Age	Gender	BMI (kg/m²)	Smoking history	Alcohol consumption history	History of hypertension	History of diabetes	Medication usage	Length of hospital stay	Total Cholesterol（mmol/L）	Triglycerides（mmol/L）	Blood Urea Nitrogen	LVEDd（cm）	LVPWT（cm）	LVEF（%）	SDNN（ms）	SDANN（ms）	PNN50（%）	HF（ms2）	LF（ms2）	LF/HF
1	75	Male	23.84	Yes	No	Yes	No	Diuretics\Anticoagulants\Antiarrhythmics	15	3.9	1.2	8	5.67	0.94	55.32	132.9	104.3	8.5	68.9	440.4	1.6
2	63	Female	21.98	No	Yes	No	No	Diuretics\Anticoagulants\Antiarrhythmics\β-Blockers	14	4.1	1	15	6.53	0.93	43.76	143.9	116.6	9.1	91.1	442.1	1.2
3	75	Female	22.73	No	No	No	No	Diuretics\Anticoagulants\Antiarrhythmics	11	4.8	1.9	13.2	6.25	0.89	43.59	159.2	123.8	9.8	88.1	454.6	2.3
4	62	Female	22.86	No	No	No	No	Diuretics\Anticoagulants\ACEIs/ARB\β-Blockers	18	4.1	1.2	11.1	6.03	0.93	56.56	132.4	102.9	10.9	135.8	461.4	2.2
5	72	Male	22.7	No	No	Yes	No	Diuretics\Anticoagulants\ACEIs/ARB\β-Blockers	11	4.6	1	10.7	6.83	0.94	21.39	180.9	113.3	9.3	163.4	453.3	1.9
6	60	Male	22.55	No	Yes	Yes	No	Diuretics\Anticoagulants\ACEIs/ARB\Antiarrhythmics	18	3.1	1.2	10.6	6.55	0.96	39.57	127	124	11.1	117	444.8	2.3
7	83	Female	22.06	Yes	No	No	No	Diuretics\Anticoagulants\ACEIs/ARB\β-Blockers	9	4	0.9	10.4	5.93	0.91	30.97	148.2	87.3	10.2	146.4	459.8	2
8	60	Female	24.19	No	No	Yes	Yes	Diuretics\Anticoagulants\ACEIs/ARB\β-Blockers	12	3.7	0.8	11.3	5.11	0.92	40.94	157	135.6	11	139.5	459.6	2
9	78	Male	22.09	No	No	Yes	No	Diuretics\Anticoagulants\ACEIs/ARB\Antiarrhythmics	14	3.3	2.4	11.4	5.14	1.05	52.52	141.8	158.9	9.8	98.2	451	1.9
10	86	Male	26.23	No	No	No	Yes	Diuretics\Anticoagulants\Antiarrhythmics	16	4.5	2	13.7	6.78	0.79	54.51	162.7	134.3	8.9	135.7	456.7	2.1
11	72	Male	23.56	No	Yes	No	No	Diuretics\Anticoagulants\ACEIs/ARB\β-Blockers	11	4.4	1.4	15.7	4.29	1.06	33.84	148.1	112.8	7.9	106	454.7	1.9
12	83	Male	24.71	No	No	No	No	Diuretics\Anticoagulants\Hormones\β-Blockers	12	4.2	0.7	12.6	5.7	0.95	39.95	119	125.4	9.8	164.6	437.1	3
13	83	Female	20.5	No	Yes	No	No	Diuretics\Anticoagulants\ACEIs/ARB\β-Blockers	16	3.5	0.9	10.6	3.99	0.99	46.78	92.3	100.7	10.6	124.6	459.1	1.4
14	87	Male	19.93	No	No	No	Yes	Diuretics\Anticoagulants\ACEIs/ARB\β-Blockers	9	4.8	1.2	13.1	6.63	0.83	41.96	188.3	149.7	9.3	167.7	441.3	1.1
15	58	Female	24.98	Yes	No	Yes	No	Diuretics\Anticoagulants\Antiarrhythmics\β-Blockers	17	4.4	1.6	11.8	6.49	0.89	48.63	123.7	134	9	114.4	441.9	1.4
16	75	Male	21.16	No	No	No	Yes	Diuretics\Anticoagulants\ACEIs/ARB\Antiarrhythmics	13	4	0.7	8.2	5.72	0.91	49.73	142.3	131.4	9.3	140.7	451.7	1.4
17	70	Male	23.18	No	Yes	No	No	Diuretics\Anticoagulants\ACEIs/ARB\β-Blockers	19	4.2	0.2	14	5.66	0.96	34.8	154.4	103.4	8.4	123.8	445.7	1.7
18	71	Male	20.05	No	No	No	No	Diuretics\Anticoagulants\ACEIs/ARB\β-Blockers	16	4.1	0.6	12.2	3.51	0.83	43.25	142.6	123.5	9.1	73.1	447.9	1.8
19	63	Female	24.91	No	No	Yes	Yes	Diuretics\Anticoagulants\ACEIs/ARB\β-Blockers	15	3.2	1.4	11.6	6.24	0.96	21.3	115.9	108.8	9.4	100	457	1.8
20	69	Male	22.06	No	Yes	Yes	Yes	Diuretics\Anticoagulants\Antiarrhythmics\β-Blockers	13	4.1	1.5	12.8	3.77	0.86	58.1	127.3	112.9	9.7	141.3	462.7	2.1
21	75	Female	21.13	No	No	No	No	Diuretics\Anticoagulants\Antiarrhythmics\β-Blockers	13	3.7	1.5	12	3.66	0.93	38.18	136.3	108.6	9.6	124	447	2
22	70	Female	23.61	No	No	No	Yes	Diuretics\Anticoagulants\ACEIs/ARB\β-Blockers	14	3.7	1.2	8.5	5.79	0.97	31.72	178.4	100.9	10.4	96.5	453.6	2.2
23	59	Male	21.06	No	No	No	No	Diuretics\Anticoagulants\ACEIs/ARB\Antiarrhythmics	14	3.6	1.4	10.8	4.88	0.95	42.39	117	102.9	9.8	109.2	446.5	2.6
24	53	Male	21.37	No	Yes	Yes	Yes	Diuretics\Anticoagulants\ACEIs/ARB\β-Blockers	12	3.9	1.1	10.8	6.09	0.99	29.2	160.2	114.6	11.7	131.9	452.4	2.4
25	40	Female	22.52	No	No	No	Yes	Diuretics\Anticoagulants\ACEIs/ARB\β-Blockers	14	3.1	1.7	9.7	6.32	0.99	45.01	147.7	89.6	10	99.7	455.1	1.4
26	88	Female	23.75	No	No	Yes	No	Diuretics\Anticoagulants\Antiarrhythmics	9	4.7	0.7	16.2	6.48	0.89	38.94	133.5	128.4	11.7	150.6	441.8	0.9
27	59	Female	23.29	No	No	No	Yes	Diuretics\Anticoagulants\ACEIs/ARB\β-Blockers	21	4.5	1.5	8.7	5.1	0.95	69.7	111.9	116.2	8.8	108.8	453	2.3
28	71	Male	23.52	No	Yes	Yes	No	Diuretics\Digoxin\Antiarrhythmics\β-Blockers	18	4.2	0.9	9.8	6.12	0.87	58.02	132.1	129.9	10.3	172.2	457.1	1.1
29	63	Male	20.64	Yes	No	Yes	Yes	Diuretics\Anticoagulants\Antiarrhythmics	9	4.2	1.1	9.2	5.81	0.85	17.2	137.3	122.7	9.4	97.5	450.7	1.9
30	62	Male	20.08	No	Yes	No	No	Diuretics\Anticoagulants\ACEIs/ARB\β-Blockers	15	3.8	1.5	7.8	6.46	0.99	50.2	101.1	126.5	10.3	130.6	471.3	1.9
31	69	Male	20.47	No	No	No	No	Diuretics\Anticoagulants\Hormones\β-Blockers	22	4.8	1.8	10.7	6.2	0.93	29.54	144.6	93.2	10.3	86.1	441.9	2.8

## Sheet: the good prognosis group
Num	Age	Gender	BMI (kg/m²)	Smoking history	Alcohol consumption history	History of hypertension	History of diabetes	Medication usage	Length of hospital stay	Total Cholesterol（mmol/L）	Triglycerides（mmol/L）	Blood Urea Nitrogen	LVEDd（cm）	LVPWT（cm）	LVEF（%）	SDNN（ms）	SDANN（ms）	PNN50（%）	HF（ms2）	LF（ms2）	LF/HF
1	72	Male	22.28	No	Yes	No	No	Diuretics\Anticoagulants\ACEIs/ARB\Antiarrhythmics	21	2.1	1.2	13.3	6.49	0.79	43.91	104.3	109	7.1	143.6	396.9	1.4
2	65	Female	19.64	No	No	No	Yes	Diuretics\Anticoagulants\β-Blockers\Antiarrhythmics	19	4.3	0.5	13.7	7.02	0.99	51.28	108.9	145.3	8.6	123.3	368.9	1.2
3	68	Male	21.8	No	Yes	No	No	Diuretics\Anticoagulants\ACEIs/ARB\β-Blockers	27	5.3	1.3	10.7	5.42	0.85	60.41	99.3	80.7	10.3	126.8	440.4	1
4	54	Male	22.29	No	No	No	No	Diuretics\Anticoagulants\β-Blockers	17	4.7	1.7	11.1	5.64	1.08	27.12	107.6	110.2	7.7	167.2	398.9	1
5	82	Male	22.74	No	No	No	No	Diuretics\Anticoagulants\β-Blockers\Antiarrhythmics	14	4.6	1.4	12.3	6.04	0.73	51.39	82.2	100.1	9.7	125.3	427.8	1.1
6	52	Female	20.89	No	No	Yes	No	Diuretics\Anticoagulants\β-Blockers	23	3.8	0.3	5.3	6.58	0.95	52.42	132.4	91.1	12.3	154.9	412.1	0.8
7	78	Male	20.17	Yes	Yes	No	Yes	Diuretics\Anticoagulants\β-Blockers	25	4.1	1	8.3	6.05	0.91	47.57	49.2	91	10.2	143.7	421	1.3
8	68	Female	20.65	No	No	No	No	Diuretics\Anticoagulants\β-Blockers\Antiarrhythmics	20	4.2	1.2	4.1	5.96	0.85	48.44	120.1	111.2	10.4	126	376.5	1.5
9	57	Male	22.38	No	No	No	Yes	Diuretics\Anticoagulants\ACEIs/ARB\β-Blockers	28	4	2.2	8.7	5.28	0.94	40.5	136.1	138.7	8.9	131.3	428.5	1.9
10	68	Male	23.19	No	Yes	Yes	Yes	Diuretics\Anticoagulants\ACEIs/ARB\β-Blockers	26	3.4	1.8	13.3	5.47	0.85	54.98	89.7	91.6	9.6	130	432.7	1.3
11	63	Female	22.19	No	Yes	No	Yes	Diuretics\Anticoagulants\ACEIs/ARB\β-Blockers	20	3.7	1.3	12.6	6.12	0.98	36.78	113.9	111.8	8.3	138.1	356.6	0.8
12	69	Male	19.39	No	No	Yes	No	Diuretics\Anticoagulants\ACEIs/ARB\Antiarrhythmics	14	3.8	2	17.8	6.95	0.92	37.4	124.6	95.2	11.1	148.4	397.6	1.2
13	60	Male	21.22	No	No	Yes	No	Diuretics\Anticoagulants\ACEIs/ARB\Antiarrhythmics	16	3.6	0.8	10.7	6.09	0.78	55	96.9	133.6	9.8	113.5	387.3	0.8
14	60	Male	20.3	No	No	No	No	Diuretics\Anticoagulants\β-Blockers	22	4.6	1.1	3	4.72	0.72	66.12	115.2	111.9	11.8	156.1	404.8	0.9
15	70	Male	19.85	No	Yes	No	No	Diuretics\Anticoagulants\ACEIs/ARB	15	5.8	2	15.8	5.98	0.89	42.14	128.2	101.5	12.5	141.6	383.1	0.9
16	69	Female	22.32	No	No	No	No	Diuretics\Anticoagulants\ACEIs/ARB\β-Blockers	28	3	2.1	14.4	5.58	1	40.77	87	113	12.2	126.1	407.4	0.8
17	46	Male	23.33	No	Yes	No	No	Diuretics\Anticoagulants\ACEIs/ARB\β-Blockers	17	4.1	1.7	8.3	5.46	0.92	51.33	141.2	103.5	10.4	131.1	414.3	1.2
18	63	Male	23.99	No	No	No	No	Diuretics\Anticoagulants\ACEIs/ARB	17	2.9	1.6	10.9	5.48	0.91	59.02	149.1	120.4	9.7	136	406.7	0.7
19	71	Female	23.22	No	Yes	No	Yes	Diuretics\Anticoagulants\ACEIs/ARB\β-Blockers	17	4.9	1	12.8	4.97	0.97	57.81	125.5	100.8	8.5	136	398.8	1.3
20	73	Female	21.23	No	No	No	No	Diuretics\Anticoagulants\ACEIs/ARB	22	5	1.7	11.5	5.4	0.8	49.74	116.1	86.6	10.7	146.5	373.6	1.4
21	71	Male	19.55	No	No	Yes	No	Diuretics\Anticoagulants\ACEIs/ARB\Antiarrhythmics	14	2.7	0.9	12.5	5.05	1.02	39.27	80.1	107.4	12	145.2	402.6	1.4
22	77	Male	22.04	No	No	No	No	Diuretics\Anticoagulants\ACEIs/ARB\β-Blockers	17	5.4	1.6	9.8	5.37	0.84	53.9	130.8	127.3	9.9	128.4	390.2	1.1
23	59	Female	19.45	Yes	No	No	Yes	Diuretics\Anticoagulants\ACEIs/ARB\β-Blockers	20	3.2	1.5	10.1	5.74	0.91	45.69	78.5	85.5	10.2	131	373.8	1.3
24	77	Female	22.48	No	Yes	Yes	No	Diuretics\Anticoagulants\β-Blockers	19	4.1	1.9	10.5	5.78	0.88	62.54	164.2	100	11.5	141.1	400.2	1.7
25	74	Female	19.81	No	No	No	No	Diuretics\Anticoagulants\β-Blockers	20	4.8	1.1	7.6	5.48	0.92	30.32	131.7	118.9	11.9	133.9	396.9	1.1
26	73	Male	20.18	No	No	No	No	Diuretics\Anticoagulants\ACEIs/ARB	21	4.1	1.6	14.9	5.53	0.75	48.24	123.7	74.5	8.2	145.8	405.5	1
27	61	Male	20.55	No	No	No	No	Diuretics\Anticoagulants\ACEIs/ARB\β-Blockers	18	5.7	1.7	10.2	5.68	1.03	61.53	103.6	113.1	10.8	124.5	422.8	1.7
28	81	Female	21.88	No	Yes	No	Yes	Diuretics\Anticoagulants\ACEIs/ARB\Antiarrhythmics	22	6	0.9	12.5	6	0.95	40.88	49.2	115	10.8	138	413.8	0.3
29	62	Female	23.84	No	No	No	Yes	Diuretics\Anticoagulants\ACEIs/ARB	15	4.1	1.4	7.4	6.64	1.07	39.38	79.1	106.9	10.2	135.9	429.6	0.9
30	75	Male	21.1	No	Yes	No	No	Diuretics\Anticoagulants\ACEIs/ARB\β-Blockers	27	2.6	2.1	6.6	6.13	1.02	35.81	126.8	92	11.9	148.8	385.7	1.9
31	77	Female	25.67	Yes	No	No	No	Diuretics\Anticoagulants\ACEIs/ARB\β-Blockers	18	3.7	1.4	9.9	5.43	0.91	43.39	189.3	103.5	9.9	116.9	382.7	0.9
32	70	Female	23.95	No	No	No	No	Diuretics\Anticoagulants\ACEIs/ARB\β-Blockers	21	3.3	1.2	9.4	6.11	0.83	44.29	138.3	105	9.2	132.5	399.3	0.9
33	71	Female	24.18	No	No	No	No	Diuretics\Anticoagulants\ACEIs/ARB	23	3.4	1.6	14.2	5.46	0.77	48.19	125.1	117.8	10.9	133.2	431.2	0.7
34	64	Male	22.35	No	No	No	Yes	Diuretics\Anticoagulants\ACEIs/ARB	15	3.1	1.2	12.2	4.28	0.91	36.39	99.1	113.7	11.2	105.3	429.5	1.4
35	52	Male	22.43	No	No	Yes	No	Diuretics\Anticoagulants\ACEIs/ARB\Antiarrhythmics	30	4	1.5	12	3.84	0.93	47.56	119.4	98.3	10.1	147.1	398.7	0.4
36	69	Male	21.46	No	Yes	Yes	No	Diuretics\Anticoagulants\ACEIs/ARB\β-Blockers	23	5.5	1.3	5.4	4.33	0.99	39.62	145	128.2	11.8	165.3	388.5	0.8
37	69	Female	23.38	No	No	No	No	Diuretics\Anticoagulants\ACEIs/ARB\Antiarrhythmics	20	3.4	1.3	7	5.47	0.83	42.34	107.9	102.9	8	129.8	368.6	1.3
38	88	Male	22.95	No	No	No	No	Diuretics\Anticoagulants\ACEIs/ARB\β-Blockers	21	3.8	1.6	10.9	5.17	0.97	36.91	173.4	91.3	8.7	135.9	415.9	1.1
39	79	Male	22.72	Yes	No	No	No	Diuretics\Anticoagulants\ACEIs/ARB	15	4.8	2	9	5.1	0.92	43.34	78.4	97	5.5	127.1	401.9	1.3
40	84	Female	22.4	No	No	Yes	No	Diuretics\Anticoagulants\β-Blockers	22	4.9	1.6	14.5	5.68	0.85	87.91	104.2	116.6	11.3	137	376	1.1
41	65	Male	18.53	No	No	No	Yes	Hormones\β-Blockers\Antiarrhythmics	18	4.3	2.2	14.6	5.14	0.97	86.04	117.3	106.6	8.9	128.1	394.2	1.3
42	67	Male	19.93	No	No	No	Yes	Diuretics\Anticoagulants\ACEIs/ARB\Antiarrhythmics	15	4.7	0.3	8.3	5.16	0.93	59.88	56	117.1	10.1	131.4	361.9	0.7
43	85	Male	23.3	No	No	No	No	Diuretics\Anticoagulants\ACEIs/ARB\β-Blockers	16	4.6	1.1	13.1	6.12	0.89	55.72	132.9	104.7	12.1	151.4	410.7	1.2
44	64	Female	19.92	No	Yes	No	No	Diuretics\Anticoagulants\ACEIs/ARB\β-Blockers	22	3.7	1.4	14.8	6.25	1.06	31.82	118	141.3	10.6	122.7	397.6	0.6
45	68	Male	21.91	Yes	No	Yes	No	Diuretics\Anticoagulants\β-Blockers	21	4.3	0.9	11.3	7.53	0.96	39.85	118.1	78.4	9.8	125.8	436.6	1.3
46	63	Male	21.45	No	No	No	No	Diuretics\Anticoagulants\ACEIs/ARB\β-Blockers	21	3.7	0.7	15.6	5.88	0.9	39.44	139.9	97.3	9.1	131.7	372.1	1
47	54	Male	19.85	Yes	No	Yes	Yes	Diuretics\Anticoagulants\β-Blockers	23	3.3	1.6	13.7	5.69	0.93	52.8	147.5	102.4	10.1	131	422.3	1.3
48	72	Female	21.76	No	No	No	No	Diuretics\Anticoagulants\ACEIs/ARB\β-Blockers	14	4.4	1.6	10.9	5.21	0.92	52.2	140.1	105	11.5	149.3	404.5	0.9
49	64	Male	20.57	No	No	No	Yes	Diuretics\Anticoagulants\ACEIs/ARB	22	4	1.5	13.1	5.5	0.92	47.87	101.3	125.7	8	156.2	403.2	1.2
50	82	Male	23.06	No	No	Yes	No	Diuretics\Anticoagulants\ACEIs/ARB\Antiarrhythmics	11	3.8	1.5	10.8	5.61	0.95	42.67	114.2	107	10.4	121.1	416.8	1.4
51	76	Male	21.82	No	No	Yes	No	Diuretics\Anticoagulants\ACEIs/ARB	16	4.2	0.9	8.8	4.3	0.86	35.9	126.4	101.9	11.8	125.1	427.1	0.4
52	72	Male	22.9	No	No	No	No	Diuretics\Anticoagulants\ACEIs/ARB\β-Blockers	20	4.7	1.1	11.4	5.45	0.85	46.67	77.3	104.7	8.2	138.6	378.3	0.5
53	64	Female	26.51	No	Yes	No	No	Diuretics\Anticoagulants\ACEIs/ARB\Antiarrhythmics	23	4.3	1.3	10.3	6.23	0.94	59.79	84	115	11.6	128.1	429.8	0.5
54	76	Male	23.53	No	No	No	No	Diuretics\Anticoagulants\ACEIs/ARB\β-Blockers	14	4.1	1	9	5.21	1.06	51.55	102.6	93.2	11.6	155.8	375.3	1.4
55	78	Male	20.97	Yes	No	No	No	Diuretics\Anticoagulants\β-Blockers	26	4.2	1.5	16.1	6.03	0.89	48.7	118	110.5	9.1	151.6	378.2	1.2
56	63	Female	21.47	No	No	Yes	Yes	Diuretics\Anticoagulants\β-Blockers\Antiarrhythmics	13	4	2.5	10.9	6.41	0.83	54.22	170.3	79.9	8.1	139.1	386.9	0.9
57	69	Female	21.55	No	No	No	No	Diuretics\Anticoagulants\ACEIs/ARB\Antiarrhythmics	17	3.4	1.1	19.3	6.48	0.89	53.37	140	102.4	11.2	139.1	417.3	1.6
58	64	Female	22.84	Yes	No	No	No	Diuretics\Anticoagulants\ACEIs/ARB	17	4.6	1.7	9.2	6.25	0.87	27.91	102.1	89.4	11.8	128.6	378.3	1.1
59	74	Female	20.69	No	No	No	No	Diuretics\Anticoagulants\ACEIs/ARB\β-Blockers	17	5	0.8	12.1	3.91	0.88	46.83	96.4	93.7	11.4	141.4	408.6	0.6
60	60	Male	23.14	Yes	No	No	No	Diuretics\Anticoagulants\ACEIs/ARB	24	3.6	2	15.4	5.22	0.95	41.68	162.5	107.9	11.7	145.7	410.3	0.8
61	70	Male	21.48	No	No	No	No	Diuretics\Anticoagulants\ACEIs/ARB\β-Blockers	16	5.4	0.8	19.3	6.34	0.9	23.08	199.1	86.6	8.6	134.2	404.7	0.6
62	82	Female	23.53	No	No	Yes	No	Diuretics\Anticoagulants\ACEIs/ARB	20	3.8	1.4	11.2	5.95	0.86	31.24	120.8	88.6	11.4	155	413.4	1.4
63	77	Female	25.18	No	No	No	Yes	Diuretics\Anticoagulants\β-Blockers	23	3.8	1	7.6	5.65	0.87	42.91	101	80.6	9.6	140.4	376.1	0.9
64	81	Male	23.15	No	No	No	No	Diuretics\Anticoagulants\ACEIs/ARB\Antiarrhythmics	18	3.3	1.6	12.9	5.99	0.8	56.16	72.5	69.8	9.6	131.3	423.1	0.7
65	72	Male	24.47	No	No	No	No	Diuretics\Anticoagulants\ACEIs/ARB	22	3.4	1.3	5.8	6.52	0.84	43.96	145.4	101.3	8	136.9	403.8	0.9
66	78	Female	20.17	No	No	No	Yes	Diuretics\Anticoagulants\ACEIs/ARB	15	3.3	1.3	9.3	5.77	0.8	49.64	124.5	121.3	12.3	145.3	417.1	0.8
67	63	Female	18.13	No	No	No	No	Diuretics\Anticoagulants\ACEIs/ARB\β-Blockers	14	4.2	2.8	11.1	5.07	0.87	36.22	151.2	100.9	10.8	127.9	380.2	1.4
68	68	Female	20.65	No	No	Yes	No	Diuretics\Anticoagulants\β-Blockers\Antiarrhythmics	17	5.2	1	15.1	5.51	0.82	21.65	87.9	100.1	12.1	131.5	402.5	1.2
69	61	Male	22.89	No	Yes	No	No	Diuretics\Anticoagulants\ACEIs/ARB\β-Blockers	35	4.4	1.3	15	5.49	0.85	47.7	123	87.8	12.9	160.2	420.3	1.2
70	78	Male	20.26	No	Yes	No	No	Diuretics\Anticoagulants\ACEIs/ARB\β-Blockers	24	4.6	2.7	10.1	6.34	0.89	35.6	95.7	127.6	8.6	127	423.3	1.2
71	73	Female	19.75	No	No	No	No	Diuretics\Anticoagulants\β-Blockers	16	5	0.7	13.3	5.97	0.81	60.18	154.6	99.8	11.5	143.6	399.6	1.1
72	75	Female	24.02	Yes	No	No	No	Hormones\β-Blockers\Antiarrhythmics	21	2.1	1.6	9.1	6.07	0.91	66.69	98.8	123.2	10.5	142.1	361.4	0.8
73	66	Male	22.13	Yes	No	No	Yes	Diuretics\Anticoagulants\β-Blockers\Antiarrhythmics	12	3.8	0.8	12.4	5.76	0.94	42.31	113	109.1	12	151.1	377.7	1.3
74	74	Female	21.31	No	No	No	No	Diuretics\Anticoagulants\ACEIs/ARB\β-Blockers	17	4.2	1.8	16.5	5.37	0.83	60.41	105	99.6	12.3	138.7	406.1	0.8
75	69	Male	21.96	No	No	No	No	Diuretics\Anticoagulants\ACEIs/ARB\β-Blockers	31	4.5	1.5	10.7	5.7	1	57.64	146	120	11.8	103.8	418.5	0.7
76	64	Female	20.49	No	Yes	No	Yes	Diuretics\Anticoagulants\ACEIs/ARB\Antiarrhythmics	16	3	1.7	9.2	5.82	0.78	30.24	128.7	118.5	9.2	122.6	411.4	0.7
77	77	Male	21.91	No	No	Yes	No	Diuretics\Anticoagulants\ACEIs/ARB\β-Blockers	26	3.2	1.2	8.5	4.57	0.88	46.22	85	101.9	10.3	138.5	388.2	1.4
78	70	Male	22.12	No	No	No	Yes	Diuretics\Anticoagulants\ACEIs/ARB\β-Blockers	21	4.6	1.4	12.6	5.79	0.79	49.63	96.3	123.3	10.9	135.5	449.8	1.4
79	76	Female	22.74	No	No	No	No	Hormones\β-Blockers\Antiarrhythmics\Digoxin	12	3.9	2.1	14.6	6.36	0.88	52.66	83.7	130.6	15.6	155.4	403	0.5
80	65	Male	23.54	No	No	Yes	Yes	Diuretics\Anticoagulants\ACEIs/ARB	19	4.4	0.2	17.2	5.57	0.8	54.44	131.1	102.6	12.5	148.9	420.1	1
81	57	Male	22.79	No	No	Yes	Yes	Diuretics\Anticoagulants\ACEIs/ARB\Antiarrhythmics	21	3.3	0.5	10.4	6.86	0.86	54.41	125.8	99.8	14.2	138.3	392.4	1.2
82	74	Male	19.22	No	No	No	Yes	Diuretics\Anticoagulants\β-Blockers\Antiarrhythmics	15	2.8	1.5	10.7	6.08	0.85	54.46	65.7	109.8	11.2	133.5	377.3	0.9
83	77	Female	18.93	No	Yes	No	Yes	Diuretics\Anticoagulants\β-Blockers\Antiarrhythmics	21	4.5	1	8.1	5.33	0.82	42.99	57.4	109	10.8	114.5	416.2	1.3
84	76	Female	21.56	No	No	No	No	Diuretics\Anticoagulants\ACEIs/ARB\Antiarrhythmics	22	4.9	1.2	15.5	5.53	0.74	51	114.4	115.9	11.5	154.2	423.8	1.2
85	55	Female	23.99	No	No	Yes	No	Diuretics\Anticoagulants\ACEIs/ARB	16	5.2	0.6	9.9	5.44	0.96	20.54	136.9	99.8	9.6	134.1	440.7	1
86	68	Female	23.26	No	No	Yes	No	Diuretics\Anticoagulants\β-Blockers	18	2.8	0.9	8.6	5.84	1.07	33.09	120.8	114.5	12.5	114.5	390	0.9
87	70	Male	24.3	No	No	Yes	Yes	Hormones\β-Blockers\Antiarrhythmics\Digoxin	17	3	1.1	17.4	6.23	1.09	60.52	68.5	119.5	10.2	137.6	366.3	1.3
88	79	Female	22.11	No	No	No	Yes	Diuretics\Anticoagulants\β-Blockers	21	2.9	0.9	12.9	5.43	0.87	38.97	68.3	106.3	8.3	133.7	436.3	1.4
89	56	Male	22.3	No	No	Yes	Yes	Diuretics\β-Blockers\Antiarrhythmics	18	3.9	0.9	12.6	6	0.91	50.4	142.1	106	11.9	125.9	407.1	1.2
90	62	Male	20.46	No	Yes	Yes	Yes	Diuretics\Anticoagulants\β-Blockers	27	3.5	1.1	6.9	7	0.87	64.06	111.2	84.6	7.9	138.3	377.1	1
91	56	Male	21.49	No	No	No	No	Diuretics\Anticoagulants\β-Blockers\Antiarrhythmics	19	4.9	0.8	11.6	6.37	0.92	36.33	103.9	85.9	7.5	124.3	389.3	1.4
92	67	Male	25.47	No	No	Yes	No	Diuretics\Anticoagulants\β-Blockers	14	2.9	2	11.9	6.29	0.84	35.51	155.8	81.5	11	116.8	383.9	0.8
93	63	Male	21.8	No	Yes	Yes	No	Diuretics\Anticoagulants\ACEIs/ARB\β-Blockers	19	2.7	0.8	6.6	5.02	0.76	40.91	91.3	84.8	8.9	112.1	426.4	1.1
94	77	Male	21.54	No	Yes	Yes	Yes	Diuretics\Anticoagulants\β-Blockers	27	4.1	2.2	9.4	5.24	0.91	51.71	119.8	101.3	9	128.3	414.2	1.6
95	66	Male	22.69	No	No	No	Yes	Hormones\β-Blockers\Antiarrhythmics\Digoxin	13	4.9	1.1	8.8	5.84	0.81	44.24	128.4	79.1	10.2	125.2	406.6	1
96	62	Male	19.97	No	No	No	No	Diuretics\Anticoagulants\β-Blockers\Antiarrhythmics	17	3.4	0.6	11.9	5.57	0.76	35.3	140.7	137.7	9.7	137.7	406.6	0.8
97	87	Male	20.21	No	No	No	No	Diuretics\Anticoagulants\ACEIs/ARB\β-Blockers	18	3	1	6.8	4.4	1.1	28.41	89.6	114.8	10.1	115	383.7	1.7
